# Supplementary material for: An ab initio study of TiS3: a promising electrode material for rechargeable Li and Na ion batteries
Source: Royal Society of Chemistry journal article supplement (doi:10.1039/c4ra15055d), 2015-01-01
Supplement: c4ra15055d1.pdf [file c4ra15055d1.pdf]

Supporting Information for:

## An ab initio study of $\text{TiS}_3$ : a promising electrode material for rechargeable Li and Na ion batteries

Jian Wu,<sup>a</sup> Da Wang,<sup>a</sup> Hao Liu,<sup>b</sup> Woon-ming Lau,<sup>a,b</sup> and Li-Min Liu<sup>\*a</sup>

<sup>a</sup>Beijing Computational Science Research Center, Beijing 100084, China

<sup>b</sup>Chengdu Green Energy and Green Manufacturing Technology R&D Center, Chengdu Development Center of Science and Technology of CAEP, Chengdu, Sichuan, 610207, China

\*Corresponding author: [limin.liu@csrc.ac.cn](mailto:limin.liu@csrc.ac.cn)

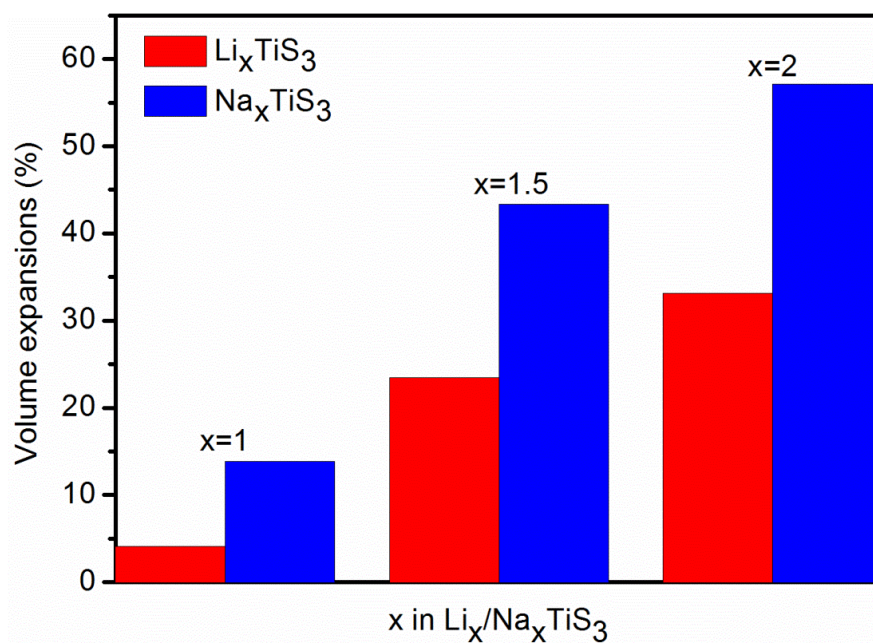

**Fig. S1:** Volume expansions computed upon Li and Na insertion in bulk  $\text{TiS}_3$  ( $\text{Li}_x/\text{Na}_x\text{TiS}_3$ ) for  $x=1, 1.5$  and  $2$ , respectively.

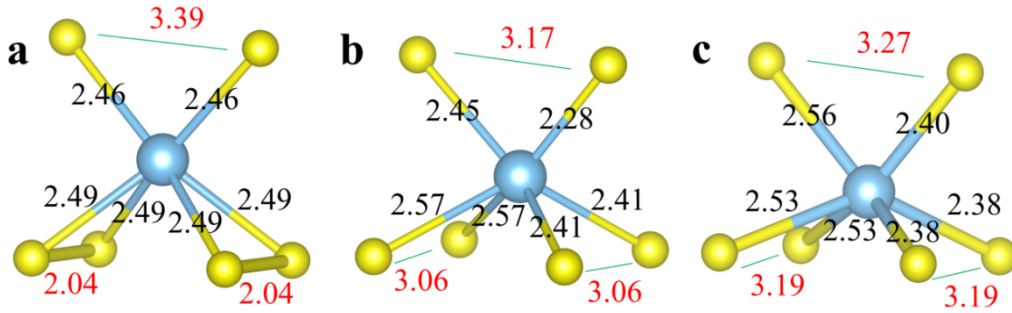

**Fig. S2:** Bond length of Ti atom and its neighbor sulfur atoms in bulk  $\text{TiS}_3$ ,  $\text{Li}_2\text{TiS}_3$  and  $\text{Na}_2\text{TiS}_3$ , respectively.

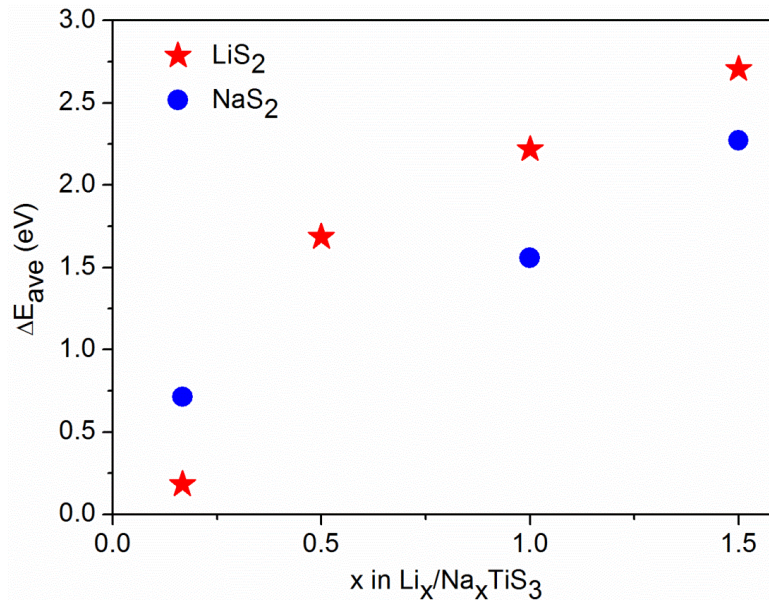

**Fig. S3:** Reaction trend of average energy difference ( $\Delta E_{\text{ave}}$ ) of  $\text{Li}_2\text{S}$  and  $\text{Na}_2\text{S}$  in monolayer  $\text{Li}_x/\text{Na}_x\text{TiS}_3$ , respectively.

**Table. S1** Energy barriers ( $\nabla E$ ) for Li and Na diffusion in bulk and monolayer  $\text{TiS}_3$  (eV) with Li/Na atoms absorbed the whole H sites except an unoccupied H site, respectively.

| $\nabla E$          | Monolayer |      | Bulk |      |
|---------------------|-----------|------|------|------|
|                     | Li        | Na   | Li   | Na   |
| H-T <sub>1</sub> -H | 0.51      | 0.64 | 0.57 | 0.46 |
| H-T <sub>2</sub> -H | 0.57      | 0.64 | 1.61 | 1.69 |
